# Supplementary material for: Side effects of low-dose tamoxifen: results from a six-armed randomised controlled trial in healthy women
Source: PubMed Central journal article supplement (PMC10307785; doi:10.1038/s41416-023-02293-z), 2023-05-06
Supplement: 41416_2023_2293_MOESM1_ESM.pdf [file 41416_2023_2293_MOESM1_ESM.pdf]

## *Supplementary material*

### **Side effects of low dose tamoxifen: Results from a six-armed randomized controlled trial in healthy women**

Mattias Hammarström, Marike Gabrielson, Alessio Crippa, Andrea Discacciati, Martin Eklund, Cecilia Lundholm, Magnus Bäcklund, Yvonne Wengström, Signe Borgquist, Jenny Bergqvist, Mikael Eriksson, José Tapia, Kamila Czene, Per Hall

| <b>Content</b>         | <b>Page</b> |
|------------------------|-------------|
| Supplementary Methods  | 2.          |
| Supplementary Table 1  | 4.          |
| Supplementary Table 2  | 6.          |
| Supplementary Figure 1 | 7.          |
| Supplementary Figure 2 | 8.          |

**Supplementary Methods. KARISMA 48-item symptom questionnaire including origin of questions.**

Question: Please mark your response for each question as it applies to the past 30 days.

|                                            | Source <sup>a</sup> | Not at all               | A little bit             | Some-what                | Quite a bit              | Very much                | Don't know/ refuse       |
|--------------------------------------------|---------------------|--------------------------|--------------------------|--------------------------|--------------------------|--------------------------|--------------------------|
| I have hot flashes                         | FACT ES             | <input type="checkbox"/> | <input type="checkbox"/> | <input type="checkbox"/> | <input type="checkbox"/> | <input type="checkbox"/> | <input type="checkbox"/> |
| I have cold sweats                         | FACT ES             | <input type="checkbox"/> | <input type="checkbox"/> | <input type="checkbox"/> | <input type="checkbox"/> | <input type="checkbox"/> | <input type="checkbox"/> |
| I have night sweats                        | FACT ES             | <input type="checkbox"/> | <input type="checkbox"/> | <input type="checkbox"/> | <input type="checkbox"/> | <input type="checkbox"/> | <input type="checkbox"/> |
| I have vaginal discharge                   | FACT ES             | <input type="checkbox"/> | <input type="checkbox"/> | <input type="checkbox"/> | <input type="checkbox"/> | <input type="checkbox"/> | <input type="checkbox"/> |
| I have vaginal itching/irritation          | FACT ES             | <input type="checkbox"/> | <input type="checkbox"/> | <input type="checkbox"/> | <input type="checkbox"/> | <input type="checkbox"/> | <input type="checkbox"/> |
| I have vaginal bleeding or spotting        | FACT ES             | <input type="checkbox"/> | <input type="checkbox"/> | <input type="checkbox"/> | <input type="checkbox"/> | <input type="checkbox"/> | <input type="checkbox"/> |
| I have vaginal dryness                     | FACT ES             | <input type="checkbox"/> | <input type="checkbox"/> | <input type="checkbox"/> | <input type="checkbox"/> | <input type="checkbox"/> | <input type="checkbox"/> |
| I have pain or discomfort with intercourse | FACT ES             | <input type="checkbox"/> | <input type="checkbox"/> | <input type="checkbox"/> | <input type="checkbox"/> | <input type="checkbox"/> | <input type="checkbox"/> |
| I have lost interest in sex                | FACT ES             | <input type="checkbox"/> | <input type="checkbox"/> | <input type="checkbox"/> | <input type="checkbox"/> | <input type="checkbox"/> | <input type="checkbox"/> |
| I have gained weight                       | FACT ES             | <input type="checkbox"/> | <input type="checkbox"/> | <input type="checkbox"/> | <input type="checkbox"/> | <input type="checkbox"/> | <input type="checkbox"/> |
| I feel dizzy                               | FACT ES             | <input type="checkbox"/> | <input type="checkbox"/> | <input type="checkbox"/> | <input type="checkbox"/> | <input type="checkbox"/> | <input type="checkbox"/> |
| I have been vomiting                       | FACT ES             | <input type="checkbox"/> | <input type="checkbox"/> | <input type="checkbox"/> | <input type="checkbox"/> | <input type="checkbox"/> | <input type="checkbox"/> |
| I have diarrhea                            | FACT ES             | <input type="checkbox"/> | <input type="checkbox"/> | <input type="checkbox"/> | <input type="checkbox"/> | <input type="checkbox"/> | <input type="checkbox"/> |
| I have headache                            | FACT ES             | <input type="checkbox"/> | <input type="checkbox"/> | <input type="checkbox"/> | <input type="checkbox"/> | <input type="checkbox"/> | <input type="checkbox"/> |
| I feel bloated                             | FACT ES             | <input type="checkbox"/> | <input type="checkbox"/> | <input type="checkbox"/> | <input type="checkbox"/> | <input type="checkbox"/> | <input type="checkbox"/> |
| I have sensitive/tender breasts            | FACT ES             | <input type="checkbox"/> | <input type="checkbox"/> | <input type="checkbox"/> | <input type="checkbox"/> | <input type="checkbox"/> | <input type="checkbox"/> |
| I have mood swings                         | FACT ES             | <input type="checkbox"/> | <input type="checkbox"/> | <input type="checkbox"/> | <input type="checkbox"/> | <input type="checkbox"/> | <input type="checkbox"/> |
| I feel irritable                           | FACT ES             | <input type="checkbox"/> | <input type="checkbox"/> | <input type="checkbox"/> | <input type="checkbox"/> | <input type="checkbox"/> | <input type="checkbox"/> |
| I have pain in my joints                   | FACT ES             | <input type="checkbox"/> | <input type="checkbox"/> | <input type="checkbox"/> | <input type="checkbox"/> | <input type="checkbox"/> | <input type="checkbox"/> |
| I have muscle cramps                       | SMPC                | <input type="checkbox"/> | <input type="checkbox"/> | <input type="checkbox"/> | <input type="checkbox"/> | <input type="checkbox"/> | <input type="checkbox"/> |
| I have skin rashes                         | SMPC                | <input type="checkbox"/> | <input type="checkbox"/> | <input type="checkbox"/> | <input type="checkbox"/> | <input type="checkbox"/> | <input type="checkbox"/> |
| I have fragile mucous membranes            | SMPC                | <input type="checkbox"/> | <input type="checkbox"/> | <input type="checkbox"/> | <input type="checkbox"/> | <input type="checkbox"/> | <input type="checkbox"/> |
| I have sight/ eye changes                  | SMPC                | <input type="checkbox"/> | <input type="checkbox"/> | <input type="checkbox"/> | <input type="checkbox"/> | <input type="checkbox"/> | <input type="checkbox"/> |
| I have abdominal obesity                   | KARISMA             | <input type="checkbox"/> | <input type="checkbox"/> | <input type="checkbox"/> | <input type="checkbox"/> | <input type="checkbox"/> | <input type="checkbox"/> |
| I have heart palpitations                  | KARISMA             | <input type="checkbox"/> | <input type="checkbox"/> | <input type="checkbox"/> | <input type="checkbox"/> | <input type="checkbox"/> | <input type="checkbox"/> |

|                 |         |                          |                          |                          |                          |                          |                          |
|-----------------|---------|--------------------------|--------------------------|--------------------------|--------------------------|--------------------------|--------------------------|
| I have dry eyes | KARISMA | <input type="checkbox"/> | <input type="checkbox"/> | <input type="checkbox"/> | <input type="checkbox"/> | <input type="checkbox"/> | <input type="checkbox"/> |
|-----------------|---------|--------------------------|--------------------------|--------------------------|--------------------------|--------------------------|--------------------------|

Question: Here is a list of symptoms. How much did the symptom bother or distress you during the past 30 days.

|                                 |      | Not at all               | A little bit             | Some-what                | Quite a bit              | Very much                | Don't know/ refuse       |
|---------------------------------|------|--------------------------|--------------------------|--------------------------|--------------------------|--------------------------|--------------------------|
| Difficulty concentrating        | MSAS | <input type="checkbox"/> | <input type="checkbox"/> | <input type="checkbox"/> | <input type="checkbox"/> | <input type="checkbox"/> | <input type="checkbox"/> |
| Pain                            | MSAS | <input type="checkbox"/> | <input type="checkbox"/> | <input type="checkbox"/> | <input type="checkbox"/> | <input type="checkbox"/> | <input type="checkbox"/> |
| Lack of energy                  | MSAS | <input type="checkbox"/> | <input type="checkbox"/> | <input type="checkbox"/> | <input type="checkbox"/> | <input type="checkbox"/> | <input type="checkbox"/> |
| Cough                           | MSAS | <input type="checkbox"/> | <input type="checkbox"/> | <input type="checkbox"/> | <input type="checkbox"/> | <input type="checkbox"/> | <input type="checkbox"/> |
| Feeling nervous                 | MSAS | <input type="checkbox"/> | <input type="checkbox"/> | <input type="checkbox"/> | <input type="checkbox"/> | <input type="checkbox"/> | <input type="checkbox"/> |
| Dry mouth                       | MSAS | <input type="checkbox"/> | <input type="checkbox"/> | <input type="checkbox"/> | <input type="checkbox"/> | <input type="checkbox"/> | <input type="checkbox"/> |
| Nausea                          | MSAS | <input type="checkbox"/> | <input type="checkbox"/> | <input type="checkbox"/> | <input type="checkbox"/> | <input type="checkbox"/> | <input type="checkbox"/> |
| Feeling drowsy                  | MSAS | <input type="checkbox"/> | <input type="checkbox"/> | <input type="checkbox"/> | <input type="checkbox"/> | <input type="checkbox"/> | <input type="checkbox"/> |
| Numbness/tingling in hands/feet | MSAS | <input type="checkbox"/> | <input type="checkbox"/> | <input type="checkbox"/> | <input type="checkbox"/> | <input type="checkbox"/> | <input type="checkbox"/> |
| Difficulty sleeping             | MSAS | <input type="checkbox"/> | <input type="checkbox"/> | <input type="checkbox"/> | <input type="checkbox"/> | <input type="checkbox"/> | <input type="checkbox"/> |
| Problems with urination         | MSAS | <input type="checkbox"/> | <input type="checkbox"/> | <input type="checkbox"/> | <input type="checkbox"/> | <input type="checkbox"/> | <input type="checkbox"/> |
| Shortness of breath             | MSAS | <input type="checkbox"/> | <input type="checkbox"/> | <input type="checkbox"/> | <input type="checkbox"/> | <input type="checkbox"/> | <input type="checkbox"/> |
| Feeling sad                     | MSAS | <input type="checkbox"/> | <input type="checkbox"/> | <input type="checkbox"/> | <input type="checkbox"/> | <input type="checkbox"/> | <input type="checkbox"/> |
| Worrying                        | MSAS | <input type="checkbox"/> | <input type="checkbox"/> | <input type="checkbox"/> | <input type="checkbox"/> | <input type="checkbox"/> | <input type="checkbox"/> |
| Itching                         | MSAS | <input type="checkbox"/> | <input type="checkbox"/> | <input type="checkbox"/> | <input type="checkbox"/> | <input type="checkbox"/> | <input type="checkbox"/> |
| Lack of appetite                | MSAS | <input type="checkbox"/> | <input type="checkbox"/> | <input type="checkbox"/> | <input type="checkbox"/> | <input type="checkbox"/> | <input type="checkbox"/> |
| Difficulty swallowing           | MSAS | <input type="checkbox"/> | <input type="checkbox"/> | <input type="checkbox"/> | <input type="checkbox"/> | <input type="checkbox"/> | <input type="checkbox"/> |
| Change in the way food tastes   | MSAS | <input type="checkbox"/> | <input type="checkbox"/> | <input type="checkbox"/> | <input type="checkbox"/> | <input type="checkbox"/> | <input type="checkbox"/> |
| Hair loss                       | MSAS | <input type="checkbox"/> | <input type="checkbox"/> | <input type="checkbox"/> | <input type="checkbox"/> | <input type="checkbox"/> | <input type="checkbox"/> |
| Constipation                    | MSAS | <input type="checkbox"/> | <input type="checkbox"/> | <input type="checkbox"/> | <input type="checkbox"/> | <input type="checkbox"/> | <input type="checkbox"/> |
| Swelling of arms/legs           | MSAS | <input type="checkbox"/> | <input type="checkbox"/> | <input type="checkbox"/> | <input type="checkbox"/> | <input type="checkbox"/> | <input type="checkbox"/> |
| "I don't look like myself"      | MSAS | <input type="checkbox"/> | <input type="checkbox"/> | <input type="checkbox"/> | <input type="checkbox"/> | <input type="checkbox"/> | <input type="checkbox"/> |

<sup>a</sup> Sources of origin:

- FACT ES= Functional Assessment of Cancer Therapy - Endocrine Symptoms, version 4, Additional concerns [24]
- MSAS= Memorial Symptom Assessment Scale [28]
- SMPC= Summary of Product Characteristics (Mylan 20 mg) [8]
- KARISMA= Identified through literature or anecdotally

**Supplementary Table 1.** Mean Likert-score at baseline in the five symptoms significantly related to tamoxifen exposure regardless of menopausal status, by dose and menopausal status.

| <i>Characteristic</i>         | <b>Tamoxifen dose in mg</b> |                   |                   |                   |                   |                   |                   |
|-------------------------------|-----------------------------|-------------------|-------------------|-------------------|-------------------|-------------------|-------------------|
|                               | <b>All</b>                  | <b>0</b>          | <b>1</b>          | <b>2.5</b>        | <b>5</b>          | <b>10</b>         | <b>20</b>         |
| Number of women included      | 1175                        | 202               | 193               | 194               | 188               | 199               | 199               |
| <i>Baseline symptom score</i> | Mean (95% CI)               | Mean (95% CI)     | Mean (95% CI)     | Mean (95% CI)     | Mean (95% CI)     | Mean (95% CI)     | Mean (95% CI)     |
| <i>Hot flashes</i>            |                             |                   |                   |                   |                   |                   |                   |
| All (n:1167)                  | 0.51 (0.46, 0.56)           | 0.46 (0.35, 0.56) | 0.51 (0.51, 0.39) | 0.42 (0.31, 0.53) | 0.55 (0.42, 0.67) | 0.44 (0.33, 0.56) | 0.68 (0.55, 0.81) |
| Premenop. (n: 451)            | 0.27 (0.22, 0.33)           | 0.21 (0.08, 0.35) | 0.31 (0.16, 0.46) | 0.20 (0.05, 0.35) | 0.19 (0.07, 0.32) | 0.24 (0.12, 0.36) | 0.47 (0.29, 0.65) |
| Postmenop. (n: 716)           | 0.66 (0.59, 0.72)           | 0.59 (0.44, 0.73) | 0.65 (0.48, 0.81) | 0.56 (0.40, 0.71) | 0.77 (0.59, 0.94) | 0.57 (0.41, 0.73) | 0.82 (0.64, 1.00) |
| <i>Cold sweats</i>            |                             |                   |                   |                   |                   |                   |                   |
| All (n:1170)                  | 0.16 (0.14, 0.19)           | 0.16 (0.09, 0.22) | 0.17 (0.10, 0.23) | 0.13 (0.07, 0.18) | 0.21 (0.13, 0.29) | 0.16 (0.09, 0.23) | 0.17 (0.10, 0.24) |
| Premenop. (n: 449)            | 0.12 (0.09, 0.16)           | 0.13 (0.03, 0.23) | 0.13 (0.04, 0.21) | 0.13 (0.05, 0.22) | 0.13 (0.03, 0.22) | 0.08 (0.02, 0.14) | 0.14 (0.04, 0.25) |
| Postmenop. (n: 716)           | 0.19 (0.15, 0.23)           | 0.17 (0.08, 0.26) | 0.20 (0.11, 0.29) | 0.12 (0.04, 0.20) | 0.27 (0.15, 0.38) | 0.20 (0.10, 0.31) | 0.18 (0.08, 0.29) |
| <i>Night sweats</i>           |                             |                   |                   |                   |                   |                   |                   |
| All (n:1170)                  | 0.65 (0.60, 0.70)           | 0.67 (0.55, 0.80) | 0.63 (0.50, 0.75) | 0.59 (0.47, 0.70) | 0.60 (0.48, 0.72) | 0.64 (0.52, 0.76) | 0.78 (0.65, 0.91) |
| Premenop. (n: 452)            | 0.54 (0.47, 0.62)           | 0.52 (0.33, 0.72) | 0.51 (0.35, 0.67) | 0.43 (0.28, 0.57) | 0.46 (0.26, 0.66) | 0.54 (0.36, 0.72) | 0.80 (0.58, 1.01) |
| Postmenop. (n: 718)           | 0.72 (0.65, 0.79)           | 0.75 (0.59, 0.91) | 0.71 (0.53, 0.88) | 0.69 (0.53, 0.86) | 0.69 (0.53, 0.85) | 0.70 (0.54, 0.86) | 0.78 (0.61, 0.94) |
| <i>Vaginal discharge</i>      |                             |                   |                   |                   |                   |                   |                   |

|                     |                   |                   |                   |                   |                   |                   |                   |
|---------------------|-------------------|-------------------|-------------------|-------------------|-------------------|-------------------|-------------------|
| All (n:1170)        | 0.49 (0.45, 0.53) | 0.40 (0.30, 0.49) | 0.51 (0.40, 0.61) | 0.51 (0.40, 0.61) | 0.51 (0.40, 0.61) | 0.45 (0.35, 0.56) | 0.57 (0.46, 0.67) |
| Premenop. (n: 451)  | 0.90 (0.82, 0.98) | 0.76 (0.56, 0.96) | 0.89 (0.69, 1.08) | 1.03 (0.83, 1.22) | 0.96 (0.76, 1.16) | 0.85 (0.65, 1.05) | 0.94 (0.74, 1.13) |
| Postmenop. (n: 719) | 0.23 (0.19, 0.26) | 0.21 (0.12, 0.29) | 0.23 (0.15, 0.32) | 0.17 (0.09, 0.25) | 0.22 (0.13, 0.32) | 0.21 (0.12, 0.30) | 0.33 (0.23, 0.42) |

---

Muscle cramps

|                     |                   |                   |                   |                   |                   |                   |                   |
|---------------------|-------------------|-------------------|-------------------|-------------------|-------------------|-------------------|-------------------|
| All (n:1173)        | 0.45 (0.41, 0.50) | 0.49 (0.38, 0.59) | 0.48 (0.37, 0.60) | 0.44 (0.32, 0.55) | 0.42 (0.31, 0.53) | 0.40 (0.30, 0.51) | 0.48 (0.36, 0.59) |
| Premenop. (n: 453)  | 0.26 (0.20, 0.30) | 0.20 (0.10, 0.30) | 0.24 (0.11, 0.36) | 0.26 (0.13, 0.39) | 0.21 (0.06, 0.36) | 0.17 (0.08, 0.26) | 0.44 (0.25, 0.64) |
| Postmenop. (n: 720) | 0.57 (0.51, 0.64) | 0.64 (0.50, 0.78) | 0.66 (0.49, 0.83) | 0.55 (0.38, 0.72) | 0.55 (0.39, 0.71) | 0.54 (0.39, 0.70) | 0.50 (0.35, 0.65) |

---

Abbreviations: CI= Confidence interval

**Supplementary Table 2.** Mean individual change of three anthropometric measures, from start to end of treatment, comparing all doses including placebo to the 20 mg tamoxifen arm, for all women combined and stratified by menopausal status.

| Anthropometrics          |      | Tamoxifen dose in mg              |                                   |                                   |                                   |                                   |             | Association with dose p-value <sup>b</sup> |
|--------------------------|------|-----------------------------------|-----------------------------------|-----------------------------------|-----------------------------------|-----------------------------------|-------------|--------------------------------------------|
|                          |      | 0                                 | 1                                 | 2.5                               | 5                                 | 10                                | 20          |                                            |
| N                        |      | Mean change (95% CI) <sup>a</sup> | Mean change (95% CI) <sup>a</sup> | Mean change (95% CI) <sup>a</sup> | Mean change (95% CI) <sup>a</sup> | Mean change (95% CI) <sup>a</sup> | Mean change |                                            |
| BMI (kg/m <sup>2</sup> ) |      |                                   |                                   |                                   |                                   |                                   |             |                                            |
| All                      | 1135 | 0.22 (0.00, 0.44)                 | 0.15 (-0.08, 0.37)                | <b>0.41 (0.18, 0.63)</b>          | 0.19 (-0.04, 0.42)                | 0.05 (-0.17, 0.27)                | Ref.        | <b>0.004</b>                               |
| Premenop.                | 436  | <b>0.28 (0.01, 0.55)</b>          | 0.26 (0, 0.53)                    | <b>0.42 (0.16, 0.69)</b>          | <b>0.35 (0.08, 0.62)</b>          | <b>0.33 (0.06, 0.59)</b>          | Ref.        | <b>0.010</b>                               |
| Postmenop.               | 699  | 0.17 (-0.15, 0.48)                | 0.08 (-0.25, 0.40)                | <b>0.40 (0.08, 0.72)</b>          | 0.09 (-0.23, 0.42)                | -0.12 (-0.44, 0.20)               | Ref.        | 0.062                                      |
| Weight (kg)              |      |                                   |                                   |                                   |                                   |                                   |             |                                            |
| All                      | 1135 | 0.59 (-0.02, 1.19)                | 0.38 (-0.22, 0.99)                | <b>1.06 (0.46, 1.67)</b>          | 0.51 (-0.10, 1.13)                | 0.12 (-0.48, 0.72)                | Ref.        | <b>0.005</b>                               |
| Premenop.                | 436  | <b>0.80 (0.04, 1.56)</b>          | 0.73 (-0.01, 1.47)                | <b>1.15 (0.4, 1.89)</b>           | <b>0.96 (0.21, 1.72)</b>          | <b>0.87 (0.12, 1.61)</b>          | Ref.        | <b>0.009</b>                               |
| Postmenop.               | 699  | 0.43 (-0.42, 1.27)                | 0.18 (-0.70, 1.05)                | <b>1.02 (0.15, 1.88)</b>          | 0.24 (-0.64, 1.12)                | -0.34 (-1.20, 0.51)               | Ref.        | 0.077                                      |
| Waist circumference (cm) |      |                                   |                                   |                                   |                                   |                                   |             |                                            |
| All                      | 1130 | 0.74 (-0.81, 2.29)                | -0.28 (-1.85, 1.29)               | 0.35 (-1.21, 1.91)                | -0.61 (-2.19, 0.98)               | -0.91 (-2.46, 0.63)               | Ref.        | 0.454                                      |
| Premenop.                | 433  | <b>3.53 (0.88, 6.17)</b>          | 0.19 (-2.40, 2.78)                | <b>2.63 (0.03, 5.24)</b>          | 0.73 (-1.90, 3.36)                | 1.80 (-0.78, 4.38)                | Ref.        | 0.083                                      |
| Postmenop.               | 697  | -0.94 (-2.84, 0.96)               | -0.50 (-2.45, 1.45)               | -1.08 (-3.00, 0.85)               | -1.42 (-3.38, 0.55)               | <b>-2.61 (-4.52, -0.69)</b>       | Ref.        | 0.623                                      |

<sup>a</sup> = Difference in mean change comparing 0 to 20 mg (ref.) tamoxifen at end of treatment (at six months or date of discontinuation)

<sup>b</sup> = P-values for linear association between dose and symptom severity change

Significant values in bold (p < 0.05)

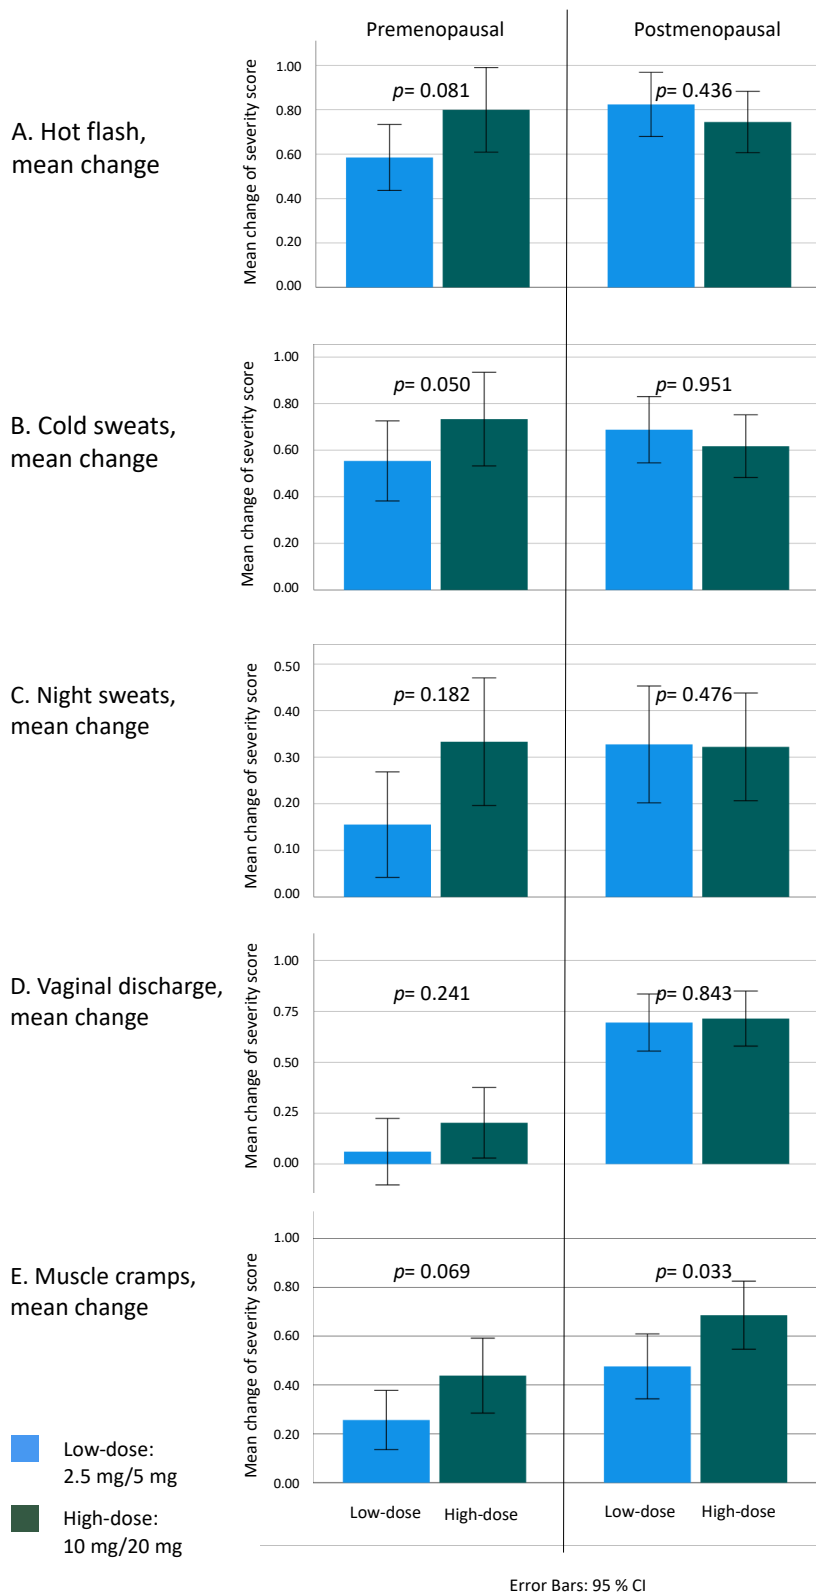

**Supplementary Figure 1.** Symptom severity change by low (2.5 mg, 5 mg) and high (10 mg, 20 mg) dose tamoxifen and stratified by menopausal status. Mean change of severity score is calculated from start to end of treatment. P-value for difference between low and high dose within each menopausal group.

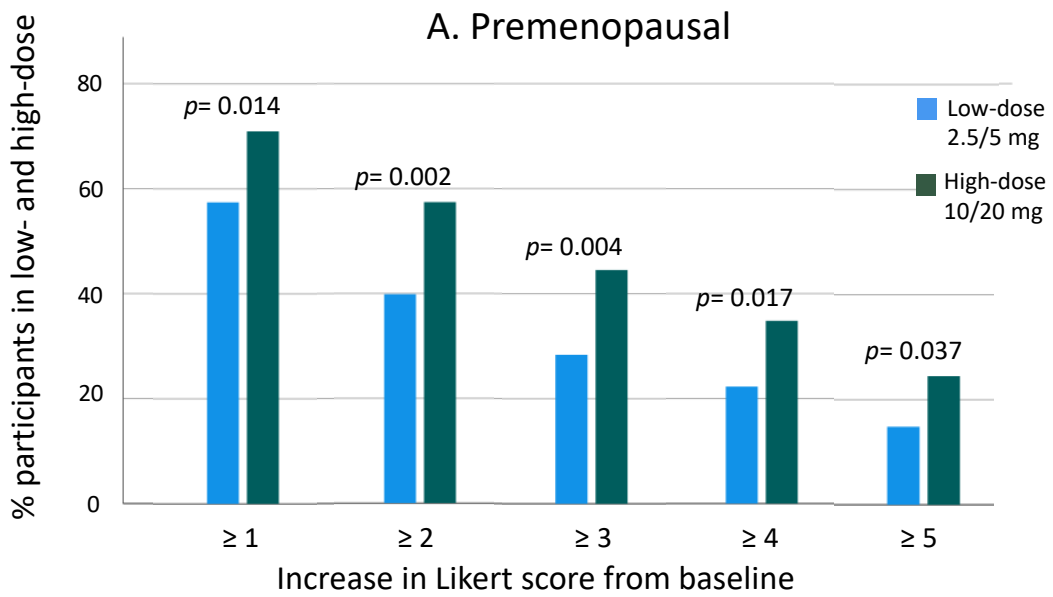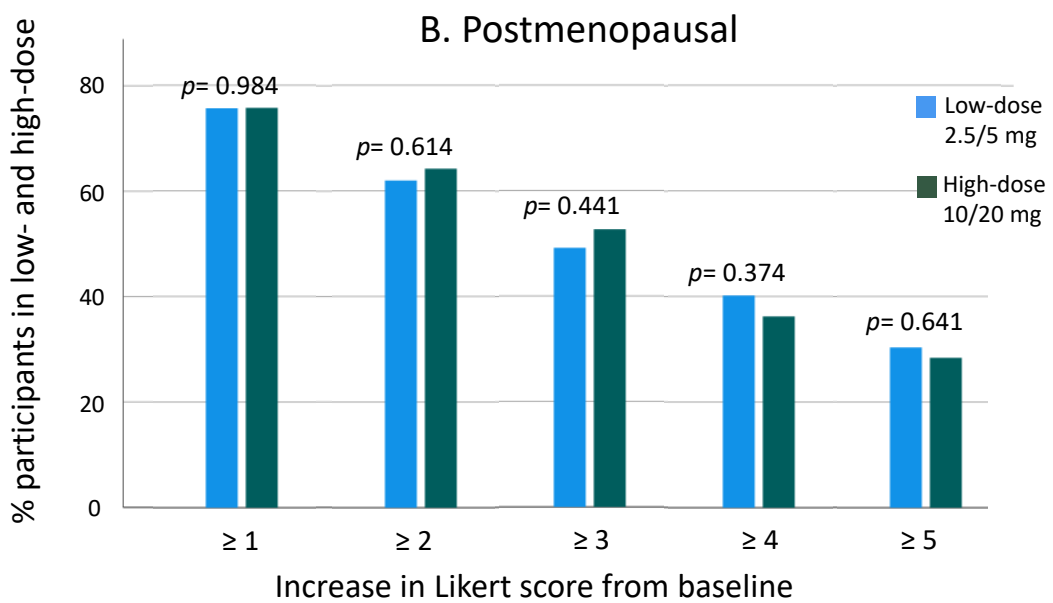

**Supplementary Figure 2.** Proportion of women increasing by  $\geq 1$ , 2, 3, 4 and 5 in Likert score, comparing baseline to end of treatment in the five symptoms significantly related to tamoxifen exposure (hot flashes, cold sweats, night sweats, vaginal discharge, and muscle cramps) and stratifying by menopausal status and dose. P-value for test of difference between low and high dose.
